# Supplementary material for: Identification and Validation of Autophagy-Related Genes in Osteoarthritis through Bioinformatics and Machine Learning
Source: Research Square preprint supplement (doi:10.21203/rs.3.rs-5617353/v1), 2024-12-23
Supplement: Supplementary file 1 [file 19fefc5f99d524691349a015.xlsx]

## Sheet: Sheet1
LASSO	RF	SVM
PPP1R15A	VEGFA	BAG3
GABARAPL1	PPP1R15A	ITGB4
BAG3	MYC	PPP1R15A
EIF4G1	KLHL24	GABARAPL1
FOXO3	GABARAPL1	VEGFA
P4HB	CDKN1A	P4HB
PELP1	P4HB	FOXO3
HIF1A	FOXO3	FOS
HSPA5
ITGB4
BNIP1
SERPINA1
TSC2
FOS

## Sheet: Sheet2
Only LASSO	Only SVM	Only RF	LASSO AND SVM NOT RF	LASSO AND RF NOT SVM	SVM AND RF NOT LASSO	LASSO AND SVM AND RF
EIF4G1		MYC	BAG3		VEGFA	PPP1R15A
PELP1		KLHL24	ITGB4			GABARAPL1
HIF1A		CDKN1A	FOS			FOXO3
HSPA5						P4HB
BNIP1
SERPINA1
TSC2
